# Supplementary material for: The Effect of Temperature on the Embryo Development of Cephalopod Sepiella japonica Suggests Crosstalk between Autophagy and Apoptosis
Source: MDPI journal article supplement (doi:10.3390/ijms242015365), 2023-10-19
Supplement: s1 [file s1]

## Tables

Table S1. Primers used for real-time quantitative PCR

| Genes            | Sequences (5'-3')     | References       |
|------------------|-----------------------|------------------|
| <i>β-actin-F</i> | GCCAGTTGCTCGTTACAG    | JN564496.1       |
| <i>β-actin-R</i> | GCCAACAATAGATGGGAAT   |                  |
| <i>GAPDH-F</i>   | TGGTTCCTTGGCTTTTGCT   | Huo et al., 2018 |
| <i>GAPDH-R</i>   | GGTGGTGGTGCGGGTAGT    |                  |
| <i>Inx4-F</i>    | ACGCGCCATATAATACACGG  |                  |
| <i>Inx4-R</i>    | CGTGGTCCCTAGCGAGATAC  |                  |
| <i>LC3-F</i>     | CGCCGTTTACAGTTGCATCC  |                  |
| <i>LC3-R</i>     | GCCGTCGTCATCTTTTCCC   |                  |
| <i>BECN1-F</i>   | GCCAACTGGAAAAATTGACC  |                  |
| <i>BECN1-R</i>   | AGAATCGGAATCCTCCTGAA  |                  |
| <i>Cas3-F</i>    | TGCAAAAACGGTTCCTGGTT  |                  |
| <i>Cas3-R</i>    | AGTCAACATAGAGGCAACGCA |                  |
| <i>p53-F</i>     | GCCTGTATCATCAACTCCAT  |                  |
| <i>p53-R</i>     | AGAATAAGTCCAGGTTGTAG  |                  |
